# Supplementary material
Source: PubMed Central journal article supplement (PMC4053463)
Supplement: epi-9-448-s01.pdf [file epi-9-448-s01.pdf]

## **Supplemental Material to:**

**Marie-Abele Bind, Johanna Lepeule, Antonella Zanobetti,  
Antonio Gasparini, Andrea Baccarelli, Brent A Coull, Letizia  
Tarantini Pantel S Vokonas, Petros Koutrakis, and Joel  
Schwartz**

**Air pollution and gene-specific methylation in the  
Normative Aging Study: association, effect modification,  
and mediation analysis**

**Epigenetics 2013; 9(3)**

**<http://dx.doi.org/10.4161/epi.27584>**

**[http://www.landesbioscience.com/journals/epigenetics/  
article/27584/](http://www.landesbioscience.com/journals/epigenetics/article/27584/)**

**Supplementary material:** Air pollution is associated with gene-specific DNA methylation in the Normative Aging Study

## **Table of Contents**

Web Figure 1: Tweedie distribution

Web Table 1: Distributions of the weather and air pollution variables

Web Table 2: Spearman correlations between weather and air pollution variables (1-week moving average)

Web Table 3: Spearman correlations between air pollutant concentrations (1<sup>st</sup> week, 2<sup>nd</sup> week, 3<sup>rd</sup> week, and 4<sup>th</sup> week moving averages preceding participant's visit)

Web Table 4: Gene-specific methylation (%5mC) across visits [5<sup>th</sup>, 50<sup>th</sup>, and 95<sup>th</sup> percentiles]

Web Table 5: Associations between participants' characteristics and gene-specific DNA methylation

Web Table 6: Associations between air pollution exposure over the 4-week period preceding medical examination and gene-specific DNA methylation according to the obesity status

Web Table 7: Associations between air pollution exposure over the 4-week period preceding medical examination and gene-specific DNA methylation according to the age category

Web Table 8: Associations between air pollution exposure over the 4-week period preceding medical examination and gene-specific DNA methylation according to the levels of LINE-1 and ALU methylation at baseline

Web Table 9: Associations between air pollution exposure over a 4-week period and gene-specific methylation across positions

Web Table 10: Associations between air pollution exposure over a 4-week period and gene-specific methylation using different models

**Web Figure 1: Tweedie distribution**

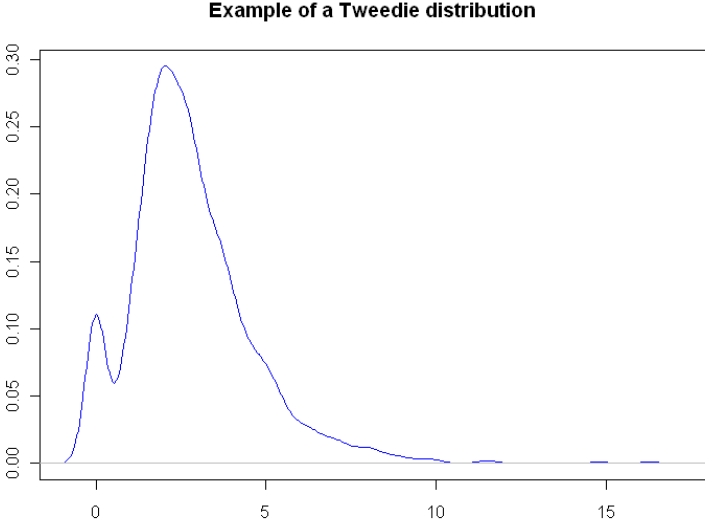

**Web Table 1: Distributions of the weather and air pollution variables**

|                                               | <b>n<sub>observations</sub></b> | <b>n<sub>missing</sub></b> | <b>IQR</b> | <b>5<sup>th</sup></b> | <b>Percentiles<br/>50<sup>th</sup></b> | <b>95<sup>th</sup></b> |
|-----------------------------------------------|---------------------------------|----------------------------|------------|-----------------------|----------------------------------------|------------------------|
| <b>Temperature (°C)</b>                       |                                 |                            |            |                       |                                        |                        |
| 1-week moving average                         | 1,798                           | 0                          | 13°C       | -1°C                  | 13°C                                   | 24°C                   |
| 2-week moving average                         | 1,798                           | 0                          | 13°C       | -1°C                  | 13°C                                   | 24°C                   |
| 3-week moving average                         | 1,798                           | 0                          | 13°C       | -1°C                  | 13°C                                   | 23°C                   |
| 4-week moving average                         | 1,798                           | 0                          | 13°C       | -1°C                  | 14°C                                   | 23°C                   |
| <b>Relative humidity(%)</b>                   |                                 |                            |            |                       |                                        |                        |
| 1-week moving average                         | 1,798                           | 0                          | 12%        | 53%                   | 68%                                    | 82%                    |
| 2-week moving average                         | 1,798                           | 0                          | 10%        | 56%                   | 68%                                    | 80%                    |
| 3-week moving average                         | 1,798                           | 0                          | 9%         | 56%                   | 68%                                    | 78%                    |
| 4-week moving average                         | 1,798                           | 0                          | 8%         | 58%                   | 69%                                    | 77%                    |
| <b>Particle number per<br/>cm<sup>3</sup></b> |                                 |                            |            |                       |                                        |                        |
| 1-week moving average                         | 1,369                           | 429                        | 15,020     | 9,024                 | 18,353                                 | 42,547                 |
| 2-week moving average                         | 1,369                           | 429                        | 14,795     | 9,219                 | 18,092                                 | 42,749                 |
| 3-week moving average                         | 1,365                           | 433                        | 14,559     | 9,273                 | 18,356                                 | 42,621                 |
| 4-week moving average                         | 1,365                           | 433                        | 14,599     | 9,352                 | 18,426                                 | 42,291                 |
| <b>Black carbon (µg/m<sup>3</sup>)</b>        |                                 |                            |            |                       |                                        |                        |
| 1-week moving average                         | 1,798                           | 0                          | 0.33       | 0.42                  | 0.73                                   | 1.16                   |
| 2-week moving average                         | 1,798                           | 0                          | 0.28       | 0.43                  | 0.73                                   | 1.07                   |
| 3-week moving average                         | 1,798                           | 0                          | 0.25       | 0.45                  | 0.74                                   | 1.05                   |
| 4-week moving average                         | 1,798                           | 0                          | 0.26       | 0.46                  | 0.74                                   | 1.04                   |
| <b>Sulfate (µg/m<sup>3</sup>)</b>             |                                 |                            |            |                       |                                        |                        |
| 1-week moving average                         | 1,555                           | 243                        | 1.47       | 1.16                  | 2.56                                   | 5.49                   |
| 2-week moving average                         | 1,553                           | 245                        | 1.29       | 1.38                  | 2.65                                   | 5.03                   |
| 3-week moving average                         | 1,535                           | 263                        | 1.27       | 1.45                  | 2.70                                   | 4.87                   |
| 4-week moving average                         | 1,555                           | 243                        | 1.22       | 1.57                  | 2.69                                   | 4.88                   |
| <b>Ozone (ppm)</b>                            |                                 |                            |            |                       |                                        |                        |
| 1-week moving average                         | 1,796                           | 2                          | 0.014      | 0.011                 | 0.024                                  | 0.038                  |
| 2-week moving average                         | 1,798                           | 0                          | 0.013      | 0.012                 | 0.025                                  | 0.036                  |
| 3-week moving average                         | 1,798                           | 0                          | 0.013      | 0.012                 | 0.026                                  | 0.036                  |
| 4-week moving average                         | 1,798                           | 0                          | 0.013      | 0.012                 | 0.026                                  | 0.035                  |

Abbreviation : Interquartile range (IQR)

**Web Table 2: Spearman correlations between weather and air pollution variables (1-week moving average)**

|                   | Temperature | Relative humidity | Particle number | Black carbon | Sulfate | Ozone  |
|-------------------|-------------|-------------------|-----------------|--------------|---------|--------|
| Temperature       | 1           | 0.22*             | -0.69*          | 0.39*        | 0.35*   | 0.49*  |
| Relative humidity |             | 1                 | -0.07*          | 0.39*        | 0.16*   | -0.22* |
| Particle number   |             |                   | 1               | -0.03        | -0.06*  | -0.39* |
| Black carbon      |             |                   |                 | 1            | 0.57*   | -0.14* |
| Sulfate           |             |                   |                 |              | 1       | 0.26*  |
| Ozone             |             |                   |                 |              |         | 1      |

\*  $P < 0.05$

**Web Table 3: Spearman correlations between air pollutant concentrations (1<sup>st</sup> week, 2<sup>nd</sup> week, 3<sup>rd</sup> week, and 4<sup>th</sup> week moving averages preceding participant's visit)**

| <b>PN</b>                  | <b>1<sup>st</sup> week</b> | <b>2<sup>nd</sup> week</b> | <b>3<sup>rd</sup> week</b> | <b>4<sup>th</sup> week</b> |
|----------------------------|----------------------------|----------------------------|----------------------------|----------------------------|
| <b>1<sup>st</sup> week</b> | 1                          | 0.90*                      | 0.88*                      | 0.86*                      |
| <b>2<sup>nd</sup> week</b> |                            | 1                          | 0.91*                      | 0.88*                      |
| <b>3<sup>rd</sup> week</b> |                            |                            | 1                          | 0.90*                      |
| <b>4<sup>th</sup> week</b> |                            |                            |                            | 1                          |
| <b>Black carbon</b>        | <b>1<sup>st</sup> week</b> | <b>2<sup>nd</sup> week</b> | <b>3<sup>rd</sup> week</b> | <b>4<sup>th</sup> week</b> |
| <b>1<sup>st</sup> week</b> | 1                          | 0.48*                      | 0.45*                      | 0.41*                      |
| <b>2<sup>nd</sup> week</b> |                            | 1                          | 0.50*                      | 0.46*                      |
| <b>3<sup>rd</sup> week</b> |                            |                            | 1                          | 0.49*                      |
| <b>4<sup>th</sup> week</b> |                            |                            |                            | 1                          |
| <b>Sulfate</b>             | <b>1<sup>st</sup> week</b> | <b>2<sup>nd</sup> week</b> | <b>3<sup>rd</sup> week</b> | <b>4<sup>th</sup> week</b> |
| <b>1<sup>st</sup> week</b> | 1                          | 0.42*                      | 0.39*                      | 0.26*                      |
| <b>2<sup>nd</sup> week</b> |                            | 1                          | 0.42*                      | 0.40*                      |
| <b>3<sup>rd</sup> week</b> |                            |                            | 1                          | 0.44*                      |
| <b>4<sup>th</sup> week</b> |                            |                            |                            | 1                          |
| <b>Ozone</b>               | <b>1<sup>st</sup> week</b> | <b>2<sup>nd</sup> week</b> | <b>3<sup>rd</sup> week</b> | <b>4<sup>th</sup> week</b> |
| <b>1<sup>st</sup> week</b> | 1                          | 0.76*                      | 0.69*                      | 0.66*                      |
| <b>2<sup>nd</sup> week</b> |                            | 1                          | 0.77*                      | 0.69*                      |
| <b>3<sup>rd</sup> week</b> |                            |                            | 1                          | 0.75*                      |
| <b>4<sup>th</sup> week</b> |                            |                            |                            | 1                          |

\*  $P < 0.05$

**Web Table 4: Gene-specific methylation (%5mC) across visits [5<sup>th</sup>, 50<sup>th</sup>, and 95<sup>th</sup> percentiles]**

|                                                 | <b>F3 mean</b>   | <b>ICAM-1 mean</b> | <b>IFN-<math>\gamma</math> mean</b> | <b>TLR-2 mean</b> | <b>IL-6 mean</b>   |
|-------------------------------------------------|------------------|--------------------|-------------------------------------|-------------------|--------------------|
| <b>n<sub>observations</sub></b>                 | 1,533            | 1,424              | 1,736                               | 1,424             | 1,749              |
| <b>n<sub>missing</sub></b>                      | 265              | 374                | 62                                  | 374               | 49                 |
| <b>Baseline (n=777)</b>                         | [1.0, 2.0, 4.5]  | [2.2, 4.1, 8.2]    | [75.4, 85.2, 91.1]                  | [1.5, 2.8, 5.3]   | [25.4, 43.7, 62.1] |
| Never smokers (n=223)                           | [0.9, 2.0, 4.7]  | [2.1, 4.1, 8.1]    | [72.4, 84.5, 91.0]                  | [1.7, 2.9, 5.7]   | [23.7, 43.5, 60.3] |
| Former smokers (n=522)                          | [1.0, 2.0, 4.2]  | [2.3, 4.1, 8.2]    | [75.6, 85.3, 91.1]                  | [1.4, 2.8, 5.3]   | [27.0, 43.8, 63.2] |
| Current smokers (n=32)                          | [1.1, 2.2, 4.6]  | [2.1, 4.5, 10.1]   | [79.7, 87.5, 91.6]                  | [1.6, 2.8, 3.8]   | [19.7, 43.5, 62.1] |
| <b>Participants having one visit (n=221)</b>    |                  |                    |                                     |                   |                    |
| <b>Visit 1</b>                                  | [1.1, 1.9, 3.5]  | [2.6, 4.3, 7.7]    | [72.4, 85.2, 91.8]                  | [1.4, 2.8, 5.0]   | [23.7, 43.8, 61.6] |
| <b>Participants having two visits (n=217)</b>   |                  |                    |                                     |                   |                    |
| <b>Visit 1</b>                                  | [1.0, 2.0, 4.2]  | [2.2, 4.1, 8.4]    | [75.4, 85.5, 90.9]                  | [1.5, 2.6, 5.1]   | [23.7, 43.1, 65.3] |
| <b>Visit 2</b>                                  | [0.8, 2.3, 4.4]  | [2.2, 3.9, 8.2]    | [75.8, 86.2, 91.4]                  | [1.0, 2.6, 5.7]   | [24.7, 42.8, 59.8] |
| <b>Participants having three visits (n=216)</b> |                  |                    |                                     |                   |                    |
| <b>Visit 1</b>                                  | [1.0, 2.0, 4.5]  | [2.1, 3.8, 7.6]    | [75.8, 84.7, 91.1]                  | [1.3, 2.8, 5.2]   | [28.9, 43.7, 59.8] |
| <b>Visit 2</b>                                  | [0.9, 2.5, 4.5]  | [2.1, 3.6, 7.8]    | [76.4, 86.8, 90.7]                  | [1.5, 2.6, 5.3]   | [28.4, 43.0, 57.5] |
| <b>Visit 3</b>                                  | [0.9, 1.8, 4.3]  | [2.9, 4.2, 6.7]    | [76.3, 86.2, 91.1]                  | [0.9, 2.1, 4.9]   | [24.9, 42.9, 59.7] |
| <b>Participants having four visits (n=120)</b>  |                  |                    |                                     |                   |                    |
| <b>Visit 1</b>                                  | [0.4, 2.3, 5.2]  | [2.1, 4.0, 9.8]    | [76.9, 84.4, 90.7]                  | [1.9, 3.3, 5.9]   | [28.9, 43.8, 61.8] |
| <b>Visit 2</b>                                  | [1.0, 2.4, 4.8]  | [2.0, 3.3, 9.9]    | [76.9, 85.6, 91.4]                  | [1.7, 3.1, 6.0]   | [25.3, 43.4, 58.4] |
| <b>Visit 3</b>                                  | [1.8, 2.9, 4.5]  | [2.5, 4.4, 6.1]    | [75.0, 86.4, 89.3]                  | [1.5, 3.0, 6.3]   | [28.7, 44.4, 62.9] |
| <b>Visit 4</b>                                  | [0.7, 1.3, 3.1]  | [2.8, 4.0, 8.3]    | [77.5, 86.2, 92.7]                  | [0.9, 1.6, 4.0]   | [26.3, 44.9, 60.5] |
| <b>Participants having five visits (n=3)</b>    |                  |                    |                                     |                   |                    |
| <b>Visit 1</b>                                  | [NA*, 3.0, 3.2]  | [3.0, 3.3, 4.5]    | [82.0, 85.6, 93.9]                  | [2.3, 3.1, 3.9]   | [NA*, 44.2, 51.8]  |
| <b>Visit 2</b>                                  | [2.6, 2.9, 3.3]  | [NA*, 2.6, 2.7]    | [84.2, 86.2, 89.9]                  | [NA*, 1.9, 2.8]   | [36.8, 44.8, 50.1] |
| <b>Visit 3</b>                                  | [2.4, 3.6, 8.5]  | [NA*, 3.5, 3.7]    | [83.9, 85.0, 86.2]                  | [NA*, NA*, 4.9]   | [39.0, 42.8, 50.1] |
| <b>Visit 4</b>                                  | [NA*, NA*, 2.2]  | [2.5, 4.2, 7.1]    | [87.7, 89.2, 89.7]                  | [NA*, NA*, 2.9]   | [13.8, 30.4, 47.9] |
| <b>Visit 5</b>                                  | [0.7, 1.6, 34.6] | [3.2, 5.2, 6.0]    | [80.1, 86.8, 92.1]                  | [1.4, 2.1, 3.5]   | [17.0, 28.6, 44.3] |

\*NA=missing data

**Web Table 5: Association between Participants' Characteristics and Gene-Specific DNA Methylation**

| Methylation mean ratio for a $\Delta$ increase in exposure            |                        |                     |                                      |               |                                     |                     |                                      |               |
|-----------------------------------------------------------------------|------------------------|---------------------|--------------------------------------|---------------|-------------------------------------|---------------------|--------------------------------------|---------------|
|                                                                       | Age ( $\Delta=1$ year) |                     | BMI ( $\Delta=1$ kg/m <sup>2</sup> ) |               | Former smokers versus never smokers |                     | Current smokers versus never smokers |               |
|                                                                       | Estimate               | 95% CI              | Estimate                             | 95% CI        | Estimate                            | 95% CI              | Estimate                             | 95% CI        |
| F3                                                                    | 0.998                  | 0.991, 1.004        | 0.990                                | 0.980, 1.000  | 1.018                               | 0.940, 1.103        | 1.094                                | 0.870, 1.376  |
| ICAM-1                                                                | 0.998                  | 0.994, 1.002        | 0.998                                | 0.991, 1.004  | 1.018                               | 0.963, 1.075        | 1.057                                | 0.907, 1.232  |
| TLR-2                                                                 | <b>1.008</b>           | <b>1.002, 1.014</b> | 1.000                                | 0.991, 1.009  | <b>0.900</b>                        | <b>0.838, 0.967</b> | 1.043                                | 0.845, 1.287  |
| Change in methylation (% 5mC) for for a $\Delta$ increase in exposure |                        |                     |                                      |               |                                     |                     |                                      |               |
|                                                                       | Age ( $\Delta=1$ year) |                     | BMI ( $\Delta=1$ kg/m <sup>2</sup> ) |               | Former smokers vs never smokers     |                     | Current smokers versus never smokers |               |
|                                                                       | Estimate               | 95% CI              | Estimate                             | 95% CI        | Estimate                            | 95% CI              | Estimate                             | 95% CI        |
| IFN- $\gamma$                                                         | -0.036                 | -0.092, 0.019       | -0.023                               | -0.112, 0.065 | <b>0.838</b>                        | <b>0.109, 1.567</b> | 1.855                                | -0.180, 3.891 |
| IL-6                                                                  | 0.017                  | -0.147, 0.114       | -0.053                               | -0.258, 0.153 | <b>1.842</b>                        | <b>0.095, 3.589</b> | -1.433                               | -5.831, 2.965 |

a) Variables included in the models:  $f_1$ (particle number)<sup>b</sup>,  $f_2$ (temperature)<sup>b</sup>,  $f_3$ (relative humidity)<sup>b</sup>, age, body mass index, smoking status, diabetes status, statin use, % neutrophils in blood count, % lymphocytes in blood count, seasonal sine and cosine, season, and methylation batch  
b)  $f_1$ (particle number),  $f_2$ (temperature), and  $f_3$ (relative humidity) represent the distributed-lag functions with sets of coefficients constrained by a natural spline (with 3 degrees of freedom) that correspond to the particle number, temperature, and relative humidity associations at lags 0 and 27 days.



**Web Table 6: Association between Air Pollution Exposure over the 4-week Period Preceding Medical Examination and Gene-Specific DNA Methylation according to the Obesity Status**

| <b>Methylation mean ratio for an interquartile range increase in air pollution</b>        |                        |                       |                     |                     |                |                     |                                    |                       |  |
|-------------------------------------------------------------------------------------------|------------------------|-----------------------|---------------------|---------------------|----------------|---------------------|------------------------------------|-----------------------|--|
|                                                                                           | <b>Particle number</b> |                       | <b>Black carbon</b> |                     | <b>Sulfate</b> |                     | <b>Ozone<br/>(March to August)</b> |                       |  |
|                                                                                           | Estimate               | 95% CI                | Estimate            | 95% CI              | Estimate       | 95% CI              | Estimate                           | 95% CI                |  |
| <b>F3</b>                                                                                 |                        |                       |                     |                     |                |                     |                                    |                       |  |
| Non obese                                                                                 | <b>0.731</b>           | <b>0.658, 0.812</b>   | <b>0.877</b>        | <b>0.824, 0.933</b> | 0.995          | 0.916, 1.081        | 1.076                              | 0.878, 1.319          |  |
| Obese                                                                                     | <b>0.714</b>           | <b>0.638, 0.799</b>   | <b>0.877</b>        | <b>0.821, 0.936</b> | 1.037          | 0.945, 1.138        | 1.097                              | 0.893, 1.348          |  |
| <b>ICAM-1</b>                                                                             |                        |                       |                     |                     |                |                     |                                    |                       |  |
| Non obese                                                                                 | <b>0.898</b>           | <b>0.830, 0.973</b>   | 1.012               | 0.967, 1.059        | 0.948          | 0.896, 1.003        | <b>0.757</b>                       | <b>0.661, 0.866</b>   |  |
| Obese                                                                                     | <b>0.873</b>           | <b>0.802, 0.951</b>   | 0.996               | 0.949, 1.044        | <b>0.927</b>   | <b>0.870, 0.989</b> | <b>0.758</b>                       | <b>0.660, 0.871</b>   |  |
| <b>TLR-2</b>                                                                              |                        |                       |                     |                     |                |                     |                                    |                       |  |
| Non obese                                                                                 | 0.941                  | 0.847, 1.046          | 1.036               | 0.981, 1.093        | 0.992          | 0.923, 1.066        | 0.932                              | 0.787, 1.103          |  |
| Obese                                                                                     | 0.944                  | 0.843, 1.056          | 1.022               | 0.965, 1.081        | 0.970          | 0.896, 1.051        | 0.904                              | 0.762, 1.073          |  |
| <b>Change in methylation (% 5mC) for an interquartile range increase in air pollution</b> |                        |                       |                     |                     |                |                     |                                    |                       |  |
|                                                                                           | <b>Particle number</b> |                       | <b>Black carbon</b> |                     | <b>Sulfate</b> |                     | <b>Ozone<br/>(March to August)</b> |                       |  |
|                                                                                           | Estimate               | 95% CI                | Estimate            | 95% CI              | Estimate       | 95% CI              | Estimate                           | 95% CI                |  |
| <b>IFN-<math>\gamma</math></b>                                                            |                        |                       |                     |                     |                |                     |                                    |                       |  |
| Non obese                                                                                 | <b>-0.975</b>          | <b>-1.834, -0.117</b> | -0.380              | -0.888, 0.128       | 0.606          | -0.181, 1.393       | <b>1.831</b>                       | <b>0.177, 3.485</b>   |  |
| Obese                                                                                     | -0.452                 | -1.310, 0.407         | -0.280              | -0.789, 0.228       | 0.657          | -0.130, 1.444       | <b>2.170</b>                       | <b>0.515, 3.824</b>   |  |
| <b>IL-6</b>                                                                               |                        |                       |                     |                     |                |                     |                                    |                       |  |
| Non obese                                                                                 | 1.525                  | -0.131, 3.182         | 0.781               | -0.101, 1.664       | 0.500          | -0.871, 1.872       | -2.277                             | -5.215, 0.660         |  |
| Obese                                                                                     | 0.980                  | -0.677, 2.636         | 0.820               | -0.063, 1.702       | -0.041         | -1.412, 1.331       | <b>-3.007</b>                      | <b>-5.944, -0.069</b> |  |

a) Variables included in the models:  $f_1$ (air pollutant)<sup>b</sup>,  $f_2$ (temperature)<sup>b</sup>,  $f_3$ (relative humidity)<sup>b</sup>, obesity status\* $f_1$ (air pollutant)<sup>b</sup>, age, body mass index, smoking status, diabetes status, statin use, % neutrophils in blood count, % lymphocytes in blood count, seasonal sine and cosine, season, and methylation batch

b)  $f_1$ (air pollutant),  $f_2$ (temperature), and  $f_3$ (relative humidity) represent the distributed-lag functions with sets of coefficients constrained by a natural spline (with 3 degrees of freedom) that correspond to the air pollution, temperature, and relative humidity associations at lags 0 and 27 days.

**Web Table 7: Association between Air Pollution Exposure over the 4-week Period Preceding Medical Examination and Gene-Specific DNA Methylation according to the Age category**

| <b>Methylation mean ratio for an interquartile range increase in air pollution</b>        |                        |                     |                     |                       |                |                     |                                    |                     |  |
|-------------------------------------------------------------------------------------------|------------------------|---------------------|---------------------|-----------------------|----------------|---------------------|------------------------------------|---------------------|--|
|                                                                                           | <b>Particle number</b> |                     | <b>Black carbon</b> |                       | <b>Sulfate</b> |                     | <b>Ozone<br/>(March to August)</b> |                     |  |
|                                                                                           | Estimate               | 95% CI              | Estimate            | 95% CI                | Estimate       | 95% CI              | Estimate                           | 95% CI              |  |
| <b>F3</b>                                                                                 |                        |                     |                     |                       |                |                     |                                    |                     |  |
| ≤72 years                                                                                 | <b>0.709</b>           | <b>0.638, 0.788</b> | <b>0.872</b>        | <b>0.819, 0.928</b>   | 0.986          | 0.903, 1.077        | 1.073                              | 0.877, 1.313        |  |
| >72 years                                                                                 | <b>0.740</b>           | <b>0.664, 0.826</b> | <b>0.886</b>        | <b>0.832, 0.943</b>   | 1.025          | 0.942, 1.116        | 1.131                              | 0.921, 1.390        |  |
| <b>ICAM-1</b>                                                                             |                        |                     |                     |                       |                |                     |                                    |                     |  |
| ≤72 years                                                                                 | <b>0.885</b>           | <b>0.816, 0.959</b> | 0.995               | 0.951, 1.041          | <b>0.936</b>   | <b>0.879, 0.997</b> | <b>0.752</b>                       | <b>0.657, 0.860</b> |  |
| >72 years                                                                                 | <b>0.893</b>           | <b>0.823, 0.968</b> | 1.025               | 0.980, 1.073          | 0.951          | 0.898, 1.008        | <b>0.782</b>                       | <b>0.682, 0.897</b> |  |
| <b>TLR-2</b>                                                                              |                        |                     |                     |                       |                |                     |                                    |                     |  |
| ≤72 years                                                                                 | 0.955                  | 0.859, 1.063        | 1.038               | 0.983, 1.096          | 1.017          | 0.944, 1.097        | 0.916                              | 0.775, 1.082        |  |
| >72 years                                                                                 | 0.926                  | 0.830, 1.033        | 1.025               | 0.971, 1.082          | 0.965          | 0.898, 1.036        | 0.884                              | 0.745, 1.050        |  |
| <b>Change in methylation (% 5mC) for an interquartile range increase in air pollution</b> |                        |                     |                     |                       |                |                     |                                    |                     |  |
|                                                                                           | <b>Particle number</b> |                     | <b>Black carbon</b> |                       | <b>Sulfate</b> |                     | <b>Ozone<br/>(March to August)</b> |                     |  |
|                                                                                           | Estimate               | 95% CI              | Estimate            | 95% CI                | Estimate       | 95% CI              | Estimate                           | 95% CI              |  |
| <b>IFN-γ</b>                                                                              |                        |                     |                     |                       |                |                     |                                    |                     |  |
| ≤72 years                                                                                 | -0.892                 | -1.750, -0.033      | -0.234              | -0.742, 0.274         | 0.703          | -0.084, 1.489       | <b>2.003</b>                       | <b>0.349, 3.657</b> |  |
| >72 years                                                                                 | -0.830                 | -1.688, 0.029       | <b>-0.520</b>       | <b>-1.028, -0.011</b> | 0.514          | -0.273, 1.300       | <b>1.737</b>                       | <b>0.083, 3.391</b> |  |
| <b>IL-6</b>                                                                               |                        |                     |                     |                       |                |                     |                                    |                     |  |
| ≤72 years                                                                                 | 1.530                  | -0.127, 3.186       | 0.766               | -0.117, 1.648         | 0.597          | -0.775, 1.969       | -2.464                             | -5.402, 0.474       |  |
| >72 years                                                                                 | 1.392                  | -0.265, 3.048       | 0.851               | -0.032, 1.733         | 0.114          | -1.258, 1.486       | -2.641                             | -5.579, 0.297       |  |

a) Variables included in the models:  $f_1$ (air pollutant)<sup>b</sup>,  $f_2$ (temperature)<sup>b</sup>,  $f_3$ (relative humidity)<sup>b</sup>, age category\* $f_1$ (air pollutant)<sup>b</sup>, age, body mass index, smoking status, diabetes status, statin use, % neutrophils in blood count, % lymphocytes in blood count, seasonal sine and cosine, season, and methylation batch

b)  $f_1$ (air pollutant),  $f_2$ (temperature), and  $f_3$ (relative humidity) represent the distributed-lag functions with sets of coefficients constrained by a natural spline (with 3 degrees of freedom) that correspond to the air pollution, temperature, and relative humidity associations at lags 0 and 27 days.

**Web Table 8: Association between Air Pollution Exposure over the 4-week Period Preceding Medical Examination on Gene-Specific DNA Methylation according to the levels of LINE-1 and ALU Methylation at Baseline**

| Methylation mean ratio for an interquartile range increase in air pollution        |                 |                       |               |                       |              |                     |                            |                       |  |
|------------------------------------------------------------------------------------|-----------------|-----------------------|---------------|-----------------------|--------------|---------------------|----------------------------|-----------------------|--|
|                                                                                    | Particle number |                       | Black carbon  |                       | Sulfate      |                     | Ozone<br>(March to August) |                       |  |
|                                                                                    | Estimate        | 95% CI                | Estimate      | 95% CI                | Estimate     | 95% CI              | Estimate                   | 95% CI                |  |
| <b>F3</b>                                                                          |                 |                       |               |                       |              |                     |                            |                       |  |
| Low LINE-1                                                                         | <b>0.765</b>    | <b>0.678, 0.863</b>   | <b>0.866</b>  | <b>0.805, 0.931</b>   | 1.000        | 0.906, 1.103        | 0.972                      | 0.743, 1.272          |  |
| High LINE-1                                                                        | <b>0.718</b>    | <b>0.640, 0.807</b>   | <b>0.898</b>  | <b>0.834, 0.967</b>   | 1.001        | 0.899, 1.115        | 1.155                      | 0.900, 1.483          |  |
| Low ALU                                                                            | <b>0.747</b>    | <b>0.664, 0.840</b>   | <b>0.898</b>  | <b>0.835, 0.965</b>   | 1.046        | 0.946, 1.157        | 1.146                      | 0.882, 1.490          |  |
| High ALU                                                                           | <b>0.701</b>    | <b>0.624, 0.788</b>   | <b>0.851</b>  | <b>0.791, 0.917</b>   | 0.979        | 0.888, 1.080        | 1.038                      | 0.816, 1.320          |  |
| <b>ICAM-1</b>                                                                      |                 |                       |               |                       |              |                     |                            |                       |  |
| Low LINE-1                                                                         | 0.925           | 0.847, 1.010          | 0.993         | 0.941, 1.047          | 0.934        | 0.872, 1.001        | <b>0.675</b>               | <b>0.568, 0.803</b>   |  |
| High LINE-1                                                                        | <b>0.862</b>    | <b>0.788, 0.942</b>   | 1.029         | 0.976, 1.086          | 0.959        | 0.890, 1.033        | 0.879                      | 0.746, 1.037          |  |
| Low ALU                                                                            | <b>0.911</b>    | <b>0.832, 0.998</b>   | 1.018         | 0.966, 1.074          | 0.967        | 0.903, 1.036        | <b>0.734</b>               | <b>0.618, 0.872</b>   |  |
| High ALU                                                                           | <b>0.879</b>    | <b>0.808, 0.957</b>   | 1.007         | 0.956, 1.061          | <b>0.930</b> | <b>0.869, 0.995</b> | <b>0.812</b>               | <b>0.692, 0.954</b>   |  |
| <b>TLR-2</b>                                                                       |                 |                       |               |                       |              |                     |                            |                       |  |
| Low LINE-1                                                                         | 0.930           | 0.827, 1.046          | 1.040         | 0.975, 1.103          | 0.945        | 0.869, 1.027        | 0.880                      | 0.709, 1.091          |  |
| High LINE-1                                                                        | 0.920           | 0.817, 1.037          | 1.009         | 0.947, 1.076          | 1.000        | 0.913, 1.096        | 0.946                      | 0.768, 1.164          |  |
| Low ALU                                                                            | 0.948           | 0.841, 1.069          | 1.016         | 0.953, 1.082          | 0.976        | 0.896, 1.062        | 0.953                      | 0.767, 1.186          |  |
| High ALU                                                                           | 0.956           | 0.853, 1.071          | 1.046         | 0.981, 1.115          | 1.005        | 0.925, 1.091        | 0.908                      | 0.743, 1.109          |  |
| Change in methylation (% 5mC) for an interquartile range increase in air pollution |                 |                       |               |                       |              |                     |                            |                       |  |
|                                                                                    | Particle number |                       | Black carbon  |                       | Sulfate      |                     | Ozone<br>(March to August) |                       |  |
|                                                                                    | Estimate        | 95% CI                | Estimate      | 95% CI                | Estimate     | 95% CI              | Estimate                   | 95% CI                |  |
| <b>IFN-<math>\gamma</math></b>                                                     |                 |                       |               |                       |              |                     |                            |                       |  |
| Low LINE-1                                                                         | <b>-1.114</b>   | <b>-1.973, -0.256</b> | <b>-0.733</b> | <b>-1.241, -0.225</b> | 0.992        | -0.205, 1.779       | <b>2.656</b>               | <b>1.002, 4.310</b>   |  |
| High LINE-1                                                                        | -0.594          | -1.453, 0.264         | 0.005         | -0.504, 0.513         | 0.593        | -0.193, 1.380       | 1.586                      | -0.068, 3.240         |  |
| Low ALU                                                                            | <b>-1.023</b>   | <b>-1.882, -0.165</b> | -0.462        | -0.971, 0.046         | 0.750        | -0.037, 1.536       | <b>3.529</b>               | <b>1.875, 5.183</b>   |  |
| High ALU                                                                           | -0.855          | -1.713, 0.004         | -0.175        | -0.683, 0.333         | 0.426        | -0.361, 1.212       | 1.029                      | -0.625, 2.683         |  |
| <b>IL-6</b>                                                                        |                 |                       |               |                       |              |                     |                            |                       |  |
| Low LINE-1                                                                         | 1.268           | -0.388, 2.925         | 0.514         | -0.369, 1.396         | 0.517        | -0.855, 1.889       | -0.042                     | -2.980, 2.895         |  |
| High LINE-1                                                                        | <b>1.794</b>    | <b>0.138, 3.451</b>   | <b>0.987</b>  | <b>0.105, 1.870</b>   | 0.504        | -0.868, 1.876       | <b>-4.482</b>              | <b>-7.420, -1.544</b> |  |
| Low ALU                                                                            | 1.185           | -0.472, 2.842         | <b>1.274</b>  | <b>0.392, 2.157</b>   | 0.756        | -0.616, 2.127       | <b>-4.556</b>              | <b>-7.494, -1.618</b> |  |
| High ALU                                                                           | <b>1.811</b>    | <b>0.154, 3.468</b>   | 0.166         | -0.716, 1.049         | -0.175       | -1.547, 1.197       | -0.893                     | -3.831, 2.045         |  |

a) Variables included in the models:  $f_1$ (air pollutant)<sup>b</sup>,  $f_2$ (temperature)<sup>b</sup>,  $f_3$ (relative humidity)<sup>b</sup>, baseline methylation status\* $f_1$ (air pollutant)<sup>b</sup>, baseline methylation status, age, body mass index, smoking status, diabetes status, statin use, % neutrophils in blood count, % lymphocytes in blood count, seasonal sine and cosine, season, and methylation batch

b)  $f_1$ (air pollutant),  $f_2$ (temperature), and  $f_3$ (relative humidity) represent the distributed-lag functions with sets of coefficients constrained by a natural spline (with 3 degrees of freedom) that correspond to the air pollution, temperature, and relative humidity associations at lags 0 and 27 days.

**Web Table 9: Associations between air pollution exposure over a 4-week period and gene-specific methylation across positions**

| <b>Methylation mean ratio for an interquartile range increase in air pollution [95% CI]</b>        |                                  |                                  |                               |                                  |
|----------------------------------------------------------------------------------------------------|----------------------------------|----------------------------------|-------------------------------|----------------------------------|
| <b>F3</b>                                                                                          | Particle number                  | Black carbon                     | Sulfate                       | O <sub>3</sub> (March to August) |
| Mean                                                                                               | <b>0.725 [0.655 to 0.803]</b>    | <b>0.877 [0.825 to 0.932]</b>    | 1.008 [0.930 to 1.093]        | 1.082 [0.885 to 1.322]           |
| Position 1                                                                                         | <b>0.677 [0.538 to 0.852]</b>    | 0.898 [0.778 to 1.038]           | 1.071 [0.863 to 1.328]        | 1.126 [0.741 to 1.711]           |
| Position 2                                                                                         | 0.892 [0.721 to 1.103]           | 0.948 [0.841 to 1.068]           | 0.874 [0.707 to 1.081]        | <b>0.633 [0.439 to 0.912]</b>    |
| Position 3                                                                                         | <b>0.686 [0.584 to 0.806]</b>    | <b>0.824 [0.753 to 0.901]</b>    | 1.074 [0.949 to 1.215]        | 1.301 [0.969 to 1.746]           |
| Position 4                                                                                         | <b>0.620 [0.496 to 0.774]</b>    | <b>0.813 [0.712 to 0.929]</b>    | <b>0.815 [0.686 to 0.969]</b> | 0.843 [0.522 to 1.362]           |
| Position 5                                                                                         | <b>0.770 [0.683 to 0.868]</b>    | <b>0.895 [0.834 to 0.961]</b>    | 0.981 [0.889 to 1.082]        | 1.170 [0.933 to 1.466]           |
| <b>ICAM-1</b>                                                                                      | Particle number                  | Black carbon                     | Sulfate                       | O <sub>3</sub> (March to August) |
| Mean                                                                                               | <b>0.889 [0.824 to 0.961]</b>    | 1.009 [0.965 to 1.055]           | 0.948 [0.896 to 1.003]        | <b>0.759 [0.664 to 0.868]</b>    |
| Position 1                                                                                         | <b>0.919 [0.852 to 0.992]</b>    | 1.020 [0.977 to 1.066]           | <b>0.944 [0.894 to 0.995]</b> | <b>0.758 [0.665 to 0.865]</b>    |
| Position 2                                                                                         | 0.926 [0.824 to 1.042]           | 1.028 [0.970 to 1.089]           | <b>0.898 [0.825 to 0.978]</b> | <b>0.664 [0.559 to 0.788]</b>    |
| Position 3                                                                                         | <b>0.811 [0.729 to 0.902]</b>    | 0.969 [0.909 to 1.032]           | 1.012 [0.936 to 1.096]        | 0.886 [0.717 to 1.096]           |
| <b>TLR-2</b>                                                                                       | Particle number                  | Black carbon                     | Sulfate                       | O <sub>3</sub> (March to August) |
| Mean                                                                                               | 0.943 [0.851 to 1.044]           | 1.032 [0.979 to 1.088]           | 0.987 [0.920 to 1.058]        | 0.917 [0.775 to 1.086]           |
| Position 1                                                                                         | 0.894 [0.765 to 1.044]           | 1.049 [0.966 to 1.140]           | 0.927 [0.824 to 1.043]        | <b>0.660 [0.505 to 0.863]</b>    |
| Position 2                                                                                         | 1.099 [0.967 to 1.249]           | 1.010 [0.940 to 1.085]           | 0.999 [0.904 to 1.105]        | 1.113 [0.877 to 1.412]           |
| Position 3                                                                                         | 0.845 [0.713 to 1.002]           | 1.030 [0.944 to 1.123]           | 1.028 [0.901 to 1.173]        | 0.809 [0.607 to 1.077]           |
| Position 4                                                                                         | 0.937 [0.830 to 1.058]           | 1.014 [0.947 to 1.087]           | 0.979 [0.893 to 1.074]        | 0.964 [0.772 to 1.202]           |
| Position 5                                                                                         | 0.895 [0.711 to 1.127]           | 1.006 [0.893 to 1.132]           | 0.931 [0.788 to 1.101]        | 1.116 [0.763 to 1.632]           |
| <b>Change in methylation (% 5mC) for an interquartile range increase in air pollution [95% CI]</b> |                                  |                                  |                               |                                  |
| <b>IFN-<math>\gamma</math></b>                                                                     | Particle number                  | Black carbon                     | Sulfate                       | O <sub>3</sub> (March to August) |
| Mean                                                                                               | -0.845 [-1.704 to 0.013]         | -0.363 [-0.872 to 0.145]         | 0.589 [-0.198 to 1.376]       | <b>1.898 [0.244 to 3.552]</b>    |
| Position 1                                                                                         | <b>-1.258 [-2.271 to -0.266]</b> | <b>-0.951 [-1.548 to -0.355]</b> | 0.339 [-0.557 to 1.235]       | <b>2.453 [0.516 to 4.390]</b>    |
| Position 2                                                                                         | -0.430 [-1.227 to 0.367]         | 0.225 [-0.251 to 0.702]          | <b>0.835 [0.094 to 1.576]</b> | 1.326 [-0.243 to 2.894]          |
| <b>IL-6</b>                                                                                        | Particle number                  | Black carbon                     | Sulfate                       | O <sub>3</sub> (March to August) |
| Mean                                                                                               | 1.412 [-0.245 to 3.068]          | 0.806 [-0.077 to 1.688]          | 0.317 [-1.055 to 1.688]       | -2.486 [-5.424 to 0.452]         |
| Position 1                                                                                         | <b>2.229 [0.397 to 4.062]</b>    | <b>1.301 [0.293 to 2.309]</b>    | 0.378 [-1.137 to 1.893]       | -3.035 [-6.490 to 0.420]         |
| Position 2                                                                                         | 0.624 [-1.065 to 2.314]          | 0.366 [-0.564 to 1.296]          | 0.273 [-1.182 to 1.727]       | -2.362 [-5.468 to 0.743]         |

a) Variables included in the models:  $f_1$ (air pollutant)<sup>b</sup>,  $f_2$ (temperature)<sup>b</sup>,  $f_3$ (relative humidity)<sup>b</sup>, age, body mass index, smoking status, diabetes status, statin use, percentage of neutrophils in blood count, percentage of lymphocytes in blood count, seasonal sine and cosine, season, and batch

b)  $f_1$ (air pollutant),  $f_2$ (temperature), and  $f_3$ (relative humidity) represent the distributed-lag functions with sets of coefficients constrained by a natural spline (with 3 degrees of freedom) that correspond to the air pollution, temperature, and relative humidity associations at lags 0 and 27 days.

**Web Table 10: Associations between air pollution exposure over a 4-week period and gene-specific methylation using different models**

| <b>Methylation mean ratio for an interquartile range increase in air pollution [95% CI]</b>        |                               |                               |                               |                                  |
|----------------------------------------------------------------------------------------------------|-------------------------------|-------------------------------|-------------------------------|----------------------------------|
| <b>F3</b>                                                                                          | Particle number               | Black carbon                  | Sulfate                       | Ozone (March to August)          |
| Main model                                                                                         | <b>0.725 [0.655 to 0.803]</b> | <b>0.877 [0.825 to 0.932]</b> | 1.008 [0.930 to 1.093]        | 1.082 [0.885 to 1.322]           |
| Co-pollutant model                                                                                 | <b>0.715 [0.644 to 0.793]</b> | <b>0.883 [0.830 to 0.940]</b> | 0.955 [0.871 to 1.046]        | <b>0.713 [0.522 to 0.974]</b>    |
| Model with further adjustments                                                                     | <b>0.725 [0.655 to 0.803]</b> | <b>0.876 [0.824 to 0.931]</b> | 1.009 [0.930 to 1.094]        | 1.075 [0.880 to 1.313]           |
| GEE model (robust variance)                                                                        | <b>0.715 [0.649 to 0.788]</b> | <b>0.882 [0.836 to 0.930]</b> | <b>0.920 [0.889 to 0.953]</b> | 1.071 [0.887 to 1.293]           |
| GEE model (robust variance and IPCW)                                                               | <b>0.758 [0.658 to 0.872]</b> | <b>0.878 [0.825 to 0.934]</b> | 0.977 [0.875 to 1.092]        | 1.117 [0.915 to 1.365]           |
| <b>ICAM-1</b>                                                                                      | Particle number               | Black carbon                  | Sulfate                       | Ozone (March to August)          |
| Main model                                                                                         | <b>0.889 [0.824 to 0.961]</b> | 1.009 [0.965 to 1.055]        | 0.948 [0.896 to 1.003]        | <b>0.759 [0.664 to 0.868]</b>    |
| Co-pollutant model                                                                                 | <b>0.890 [0.824 to 0.962]</b> | 1.004 [0.960 to 1.050]        | 0.968 [0.912 to 1.027]        | 0.953 [0.767 to 1.186]           |
| Model with further adjustments                                                                     | <b>0.892 [0.826 to 0.963]</b> | 1.010 [0.966 to 1.056]        | 0.951 [0.899 to 1.006]        | <b>0.762 [0.666 to 0.872]</b>    |
| GEE model (robust variance)                                                                        | <b>0.889 [0.831 to 0.951]</b> | 1.028 [0.981 to 1.078]        | 0.948 [0.897 to 1.003]        | <b>0.743 [0.623 to 0.887]</b>    |
| GEE model (robust variance and IPCW)                                                               | <b>0.924 [0.856 to 0.999]</b> | <b>1.070 [1.010 to 1.130]</b> | 0.946 [0.886 to 1.011]        | <b>0.747 [0.630 to 0.885]</b>    |
| <b>TLR-2</b>                                                                                       | Particle number               | Black carbon                  | Sulfate                       | Ozone (March to August)          |
| Main model                                                                                         | 0.943 [0.851 to 1.044]        | 1.032 [0.979 to 1.088]        | 0.987 [0.920 to 1.058]        | 0.917 [0.775 to 1.086]           |
| Co-pollutant model                                                                                 | 0.924 [0.832 to 1.026]        | 1.029 [0.976 to 1.086]        | 0.964 [0.886 to 1.049]        | 0.881 [0.638 to 1.215]           |
| Model with further adjustments                                                                     | 0.938 [0.847 to 1.040]        | 1.031 [0.977 to 1.087]        | 0.988 [0.921 to 1.060]        | 0.916 [0.773 to 1.084]           |
| GEE model (robust variance)                                                                        | 0.943 [0.856 to 1.039]        | 1.031 [0.979 to 1.086]        | 0.988 [0.915 to 1.067]        | 0.917 [0.788 to 1.068]           |
| GEE model (robust variance and IPCW)                                                               | 0.899 [0.783 to 1.033]        | 1.048 [0.988 to 1.112]        | 0.955 [0.854 to 1.068]        | 0.935 [0.795 to 1.099]           |
| <b>Change in methylation (% 5mC) for an interquartile range increase in air pollution [95% CI]</b> |                               |                               |                               |                                  |
| <b>IFN-<math>\gamma</math></b>                                                                     | Particle number               | Black carbon                  | Sulfate                       | Ozone (March to August)          |
| Main model                                                                                         | -0.845 [-1.704 to 0.013]      | -0.363 [-0.872 to 0.145]      | 0.589 [-0.198 to 1.376]       | <b>1.898 [0.244 to 3.552]</b>    |
| Co-pollutant model                                                                                 | -0.829 [-1.694 to 0.036]      | -0.317 [-0.831 to 0.197]      | 0.535 [-0.335 to 1.406]       | 1.151 [-1.650 to 3.952]          |
| Model with further adjustments                                                                     | -0.803 [-1.662 to 0.057]      | -0.328 [-0.837 to 0.180]      | 0.654 [-0.133 to 1.441]       | <b>1.925 [0.271 to 3.579]</b>    |
| GEE model (robust variance)                                                                        | -0.753 [-1.740 to 0.238]      | -0.358 [-0.877 to 0.162]      | 0.587 [-0.251 to 1.420]       | <b>1.880 [0.286 to 3.470]</b>    |
| GEE model (robust variance and IPCW)                                                               | -0.618 [-2.320 to 1.080]      | -0.656 [-1.420 to 0.109]      | 0.935 [-0.314 to 2.180]       | <b>2.290 [0.590 to 4.000]</b>    |
| <b>IL-6</b>                                                                                        | Particle number               | Black carbon                  | Sulfate                       | Ozone (March to August)          |
| Main model                                                                                         | 1.412 [-0.245 to 3.068]       | 0.806 [-0.077 to 1.688]       | 0.317 [-1.055 to 1.688]       | -2.486 [-5.424 to 0.452]         |
| Co-pollutant model                                                                                 | 1.180 [-0.496 to 2.855]       | 0.827 [-0.065 to 1.719]       | 0.724 [-1.104 to 2.552]       | -3.316 [-8.655 to 2.024]         |
| Model with further adjustments                                                                     | 1.403 [-0.257 to 3.064]       | 0.800 [-0.086 to 1.686]       | 0.310 [-1.065 to 1.686]       | -2.466 [-5.415 to 0.483]         |
| GEE model (robust variance)                                                                        | <b>2.560 [0.541 to 4.590]</b> | <b>1.380 [0.194 to 2.570]</b> | 0.827 [-0.648 to 2.300]       | <b>-4.520 [-8.620 to -0.425]</b> |
| GEE model (robust variance and IPCW)                                                               | 0.588 [-2.580 to 3.750]       | 1.060 [-0.127 to 2.240]       | -0.209 [-2.200 to 1.780]      | <b>-4.820 [-8.190 to -1.460]</b> |

Abbreviations: Generalized estimating equations (GEE), Inverse probability censoring weights (IPCW)

a) Variables included in the main model:  $f_1$ (air pollutant)<sup>f</sup>,  $f_2$ (temperature)<sup>f</sup>,  $f_3$ (relative humidity)<sup>f</sup>, age, body mass index, smoking status, diabetes status, statin use, % neutrophils in blood count, % lymphocytes in blood count, seasonal sine and cosine, season, and batch.

b) Air pollution variables included in the co-pollutant model:  $f_{11}$ (air pollutant<sub>1</sub>)<sup>f</sup>,  $f_{12}$ (air pollutant<sub>2</sub>)<sup>f</sup>, where air pollutant<sub>2</sub> is ozone when air pollutant<sub>1</sub> is particle number or black carbon and air pollutant<sub>2</sub> is particle number when air pollutant<sub>1</sub> is sulfate or ozone

c) Additional variables included in the model with further adjustments: cigarette pack-years, more than two drinks per day, and maximal education

d) Variables included in the GEE model with robust variance: same as in main model

e) Variables included in the GEE model with robust variance and IPCW (inverse probability censoring weights): same as in main model

f)  $f_1$ (air pollutant),  $f_2$ (temperature), and  $f_3$ (relative humidity) represent the distributed-lag functions with sets of coefficients constrained by a natural spline (with 3 degrees of freedom) that correspond to the air pollution, temperature, and relative humidity associations at lags 0 and 27 days.-
